# Supplementary material for: No Tumorigenicity of Allogeneic Induced Pluripotent Stem Cells in Major Histocompatibility Complex-matched Cynomolgus Macaques
Source: PubMed Central journal article supplement — Cell Transplant. 2021 Feb 16;30:0963689721992066. doi: 10.1177/0963689721992066 (PMC7894586; doi:10.1177/0963689721992066), 2021-02-16
Supplement: sj-pdf-1-cll-10.1177_0963689721992066.pdf [file sj-pdf-1-cll-10.1177_0963689721992066.pdf]

## **No tumorigenicity of allogeneic induced pluripotent stem cells in major histocompatibility complex-matched cynomolgus macaques**

Hirohito Ishigaki<sup>1+</sup>, Van Loi Pham<sup>1,2+</sup>, Jun Terai<sup>1</sup>, Takako Sasamura<sup>1</sup>, Cong Thanh Nguyen<sup>1</sup>, Hideaki Ishida<sup>1</sup>, Junko Okahara<sup>3</sup>, Shin Kaneko<sup>4</sup>, Takashi Shiina<sup>5</sup>, Misako Nakayama<sup>1</sup>, Yasushi Itoh<sup>1</sup> and Kazumasa Ogasawara<sup>1</sup>

<sup>1</sup>Division of Pathology and Disease Regulation, Department of Pathology, Shiga University of Medical Science

<sup>2</sup>Biomolecular and Genetic Unit, Department of Hematology, Choray Hospital

<sup>3</sup>Central Institute for Experimental Animals

<sup>4</sup>Center for iPS Cell Research and Application, Kyoto University

<sup>5</sup>Department of Molecular Life Science, Division of Basic Medical Science and Molecular Medicine, Tokai University School of Medicine

<sup>+</sup>These authors contributed equally to this work.

### **Corresponding author: Hirohito Ishigaki, MD, PhD**

Division of Pathology and Disease Regulation, Department of Pathology, Shiga University of Medical Science, Otsu, Shiga, Japan, 5202192

Phone: +81-77-548-2172, FAX: +81-77-548-2423; E-mail address: [ihiro@belle.shiga-med.ac.jp](mailto:ihiro@belle.shiga-med.ac.jp)

### **Supplemental Figure 1: Immunohistochemistry of iPSCs.**

Four iPSCs were stained with antibodies specific for TRA-1-60, SSEA4, OCT3/4, and NANOG. The magnification of all figures was  $\times 40$ . \*: passage number

### **Supplemental Figure 2: RT-PCR of iPSCs**

The numbers at the top of panels shows cells of which mRNA were collected. The correspondence between numbers and cell names is as follows; (1) monkey ESCs p27, (2) CMF1/1-1 p35, (3) CMF1/1-2 p21, (4) CMT1/1-4 p23, and (5) CMT1/1-6 p20.

### **Supplemental Figure 3: Characteristics of iMSC derived from CMF1/1-1 cells.**

(A) Schema for mesenchymal stem cell-like cells (iMSC) induction. iMSCs were derived from iPSCs during hematopoietic differentiation. iMSC progenitor cells were included in the  $CD45^- CD34^-$  fraction (circled). (B) Stereoscopic image of iMSCs. Cuboidal adherent cells can be seen. The magnification was  $\times 40$ . (C) Flow cytometric analysis of iMSCs. The cells were positive for CD105, CD73, CD44, CD90, and CD29, being consistent with the definition given by the Mesenchymal and Tissue Stem Cell Committee of ISCT. (D) iMSCs differentiated into chondrocytes (Alcian Blue), osteoblasts (Alkaline phosphatase), and adipocytes (Oil-red O). (E) TGF- $\beta$  in the culture supernatant of iMSCs. iMSCs produced TGF- $\beta$ . ND: not detected.

### **Supplemental Figure 4: Immune cells infiltrating the teratoma derived from CMF1/1-1 cells in autologous transplantation #733 and NOD-SCID mice.**

(A, B) The excised teratoma derived from CMF1/1-1 in autologous transplantation of #733 was cut into 2 pieces. One piece of teratoma was minced and passed through a cell strainer to remove debris for flow cytometric assay (A). The other piece was fixed with formalin for histological analysis (B). (A) Flow cytometric analysis of infiltrating lymphocytes. Whole cells were stained with antibodies specific to indicated molecules and analyzed after gating on a lymphocyte fraction. (B) Immunohistochemistry of the excised teratoma. Infiltrating lymphocytes were found. The magnifications of sections stained for CD3 (T cells), CD4 (helper T cells), CD8 (killer T cells), CD20 (B cells), CD68 (macrophages), and Granzyme B (NK cells, allow heads) were  $\times 200$ ,  $\times 200$ ,  $\times 200$ ,  $\times 200$ ,  $\times 400$ , and  $\times 400$ , respectively. (C) The excised teratoma derived from CMF1/1-1 in NOD-SCID mice. The upper and middle

panels respectively show HE staining section in low magnification ( $\times 40$ ) and high magnification ( $\times 400$ ). The lower panel showed immunohistochemistry of the excised teratoma. Arrow heads show Granzyme B positive cells (NK cells). The magnification was  $\times 400$ .

### **Supplemental Figure 5: Flow cytometric analysis of IgG specificity against MHC-matched 733F PBMCs and MHC-matched embryonal carcinoma cells**

Monkey embryonal carcinoma were derived from CMF1/1-1 and expressing embryonic antigens such as SSEA4 and OCT3/4<sup>31</sup>. Cells were incubated with the collected plasmas. Fluorescein conjugated anti-monkey IgG was used for secondary antibody to detect the specific IgG attaching on the cell surface. Filled histograms indicate cells stained with plasmas collected before transplantation as control, lines indicate cells stained with plasmas collected at 4 weeks after transplantation. \*: passage number.

### **Supplemental Figure 6: flow cytometric analysis of iPSCs.**

(A, B) Flow cytometric analysis of the expression of MHC class I (A) and CD47 (B) on the surface of iPSCs. Lines indicate cells stained with antibodies against indicated molecules. Filled histograms indicate negative controls stained with isotype-matched control antibodies. (C) iPSCs were stained by lectins, MALII and SNA, which specifically recognize  $\alpha 2-3$  and  $\alpha 2-6$  sialic acids, respectively. Filled histograms indicate PBS control. Lines indicate cells stained with lectins. Hatched lines indicate cells stained with lectins after sialidase treatment. Lower intensity of the lectin staining after sialidase treatment showed that the lectins certainly recognized sialic acid on the surface of iPSCs. \*: passage number.
